# Supplementary material
Source: PubMed Central journal article supplement (PMC3086965)
Supplement: NIHMS271118-supplement-01.pdf [file NIHMS271118-supplement-01.pdf]

## Supplemental Data

### Separate results for the anteroventral striatum and the ventral putamen:

#### *Raclopride binding ratios:*

Anteroventral striatum (AVS): In the entire sample no effect was significant in the AVS: main effect of condition ( $F_{1,23} = 0.96$ ,  $p < 0.33$ ), main effect of lateralization ( $F_{1,23} = 0.42$ ,  $p < 0.52$ ), interaction between condition and lateralization ( $F_{1,23} = 2.76$ ,  $p < 0.11$ ). Adding gender as a between-subject factor did not yield any significant results.

Ventral putamen: The main effect of condition ( $F_{1,23} = 4.11$ ,  $p < 0.05$ ) and the lateralization factor ( $F_{1,23} = 64.8$ ,  $p < 0.001$ ) were significant, but not the interaction between condition and lateralization ( $F_{1,23} = 2.58$ ,  $p = 0.12$ ). Subsequent tests showed a significant decrease in [ $^{11}\text{C}$ ]raclopride  $BP_{\text{ND}}$  during the reward task versus the sensorimotor task conditions on the right side ( $p < 0.05$ ), but not the left side ( $p = 0.24$ ), as well as significantly lower mean [ $^{11}\text{C}$ ]raclopride  $BP_{\text{ND}}$  values on the right side versus the left during the sensorimotor ( $p < 0.001$ ) and the reward ( $p < 0.001$ ) conditions.

Using gender as a between-subjects factor in the ANOVA's yielded significant results in the ventral putamen for the condition x gender x laterality interaction ( $F_{1,21} = 21$ ,  $p < 0.01$ ). The  $\Delta\text{BP}$  during the reward condition relative to the control condition was greater in women than in men in *left* ventral putamen (mean  $\Delta\text{BP} = -4.3 \pm 5.4\%$  and  $0.60 \pm 5.7\%$ , respectively; unpaired  $t = 2.18$ ;  $p < 0.04$ ) but did not differ between men and women in the *right* ventral putamen (mean  $\Delta\text{BP}$  women =  $-5 \pm 10.9\%$  and  $-3.3 \pm 7.3$  for men; unpaired  $t = 0.42$ ,  $p < 0.67$ ). These  $\Delta\text{BP}$  values between conditions were significant only in the left ventral putamen and only in women ( $p < 0.02$ ). The difference in mean  $\Delta\text{BP}$  values between the right and left ventral putamen was significant in men ( $p < 0.001$ ) but not in women ( $p < 0.76$ ).
